# Supplementary material for: Recurring mutations in RPL15 are linked to hydrops fetalis and treatment independence in Diamond-Blackfan anemia
Source: PubMed Central journal article supplement — Haematologica. 2018 Mar 29;103(6):949–58. doi: 10.3324/haematol.2017.177980 (PMC6058779; doi:10.3324/haematol.2017.177980), 2018-06
Supplement: 2017_177980-Disclosures_and_Contributions.pdf [file 2017_177980-Disclosures_and_Contributions.pdf]

Haematologica  
HAEMATOL/2017/177980  
Version 3

Recurring mutations in RPL15 are linked to hydrops fetalis and  
treatment independence in Diamond-Blackfan anemia

Marcin W Wlodarski, Lydie Da Costa, Marie-Françoise O'Donohue,  
Marc Gastou, Narjese Karboul, Nathalie Montel-Lehry, Ina Hainman,  
Dominika Danda, Amina Szvetnik, Victor Pastor, Nahuel Paolini,  
Franca M di Summa, Hannah Tamary, Abed Abu Quider, Anna Aspesi,  
Riekelt H Houtkooper, Thierry LeBlanc, Charlotte Niemeyer,  
Pierre-Emmanuel Gleizes, and Alyson W MacInnes

Disclosures: None

Contributions: MW, LDC, HT, MOD, PEG, and AWM, designed the research and analyzed data. MW, LDC, MOD, MG, NK, NML, AS, IH, VP, DD, NP, FdS, HT, AAQ, AWM performed research and analyzed data. MW, LDC, RHH, HT, PEG, and AWM acquired funding. MW, LDC, HT, AAQ, TL, and CN contributed vital new reagents. AWM and MW wrote the paper with input from all authors.
